# Supplementary material for: Alginate oligosaccharide ameliorates azithromycin-induced gut microbiota disorder via Bacteroides acidifaciens-FAHFAs and Bacteroides-TCA cycle axes
Source: Royal Society of Chemistry journal article supplement (doi:10.1039/d2fo02812c), 2022-12-08

Electronic Supplementary Material (ESI) for Food & Function.  
 This journal is © The Royal Society of Chemistry 2022

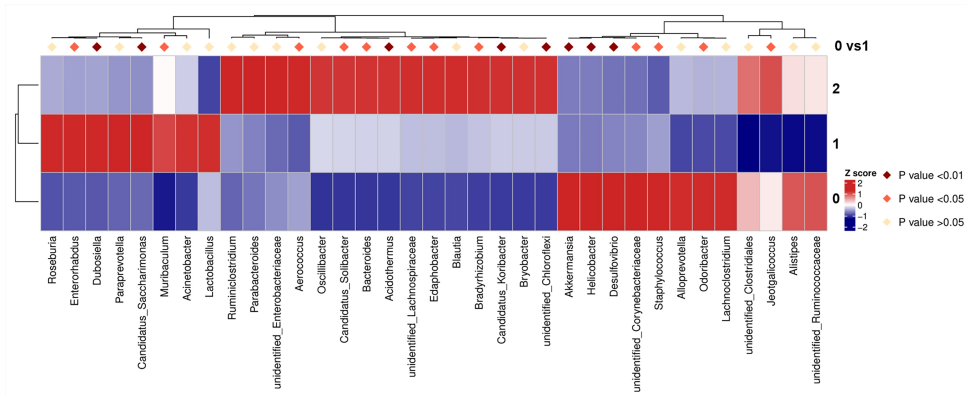

Supplement: d2fo02812c2.pdf [file d2fo02812c2.pdf]
