# Supplementary figures and images for: Alginate oligosaccharide ameliorates azithromycin-induced gut microbiota disorder via Bacteroides acidifaciens-FAHFAs and Bacteroides-TCA cycle axes
Source: Royal Society of Chemistry journal article supplement (doi:10.1039/d2fo02812c), 2022-12-08

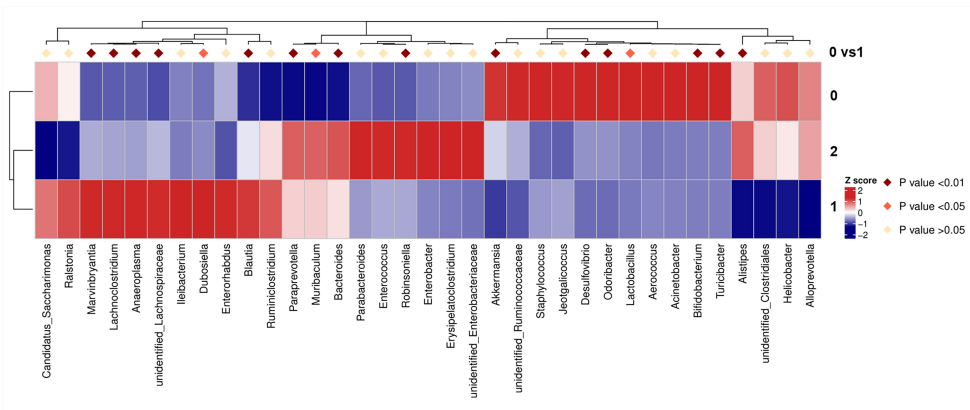

Supplement: d2fo02812c3.pdf [file d2fo02812c3.pdf]
